# Supplementary material for: Associations Between Capillary Diameter, Capillary Density, and Microaneurysms in Diabetic Retinopathy: A High-Resolution Confocal Microscopy Study
Source: PubMed Central journal article supplement — Transl Vis Sci Technol. 2021 Feb 9;10(2):6. doi: 10.1167/tvst.10.2.6 (PMC7873504; doi:10.1167/tvst.10.2.6), 2021-02-09
Supplement: tvst-10-2-6_s001.pdf [file tvst-10-2-6_s001.pdf]

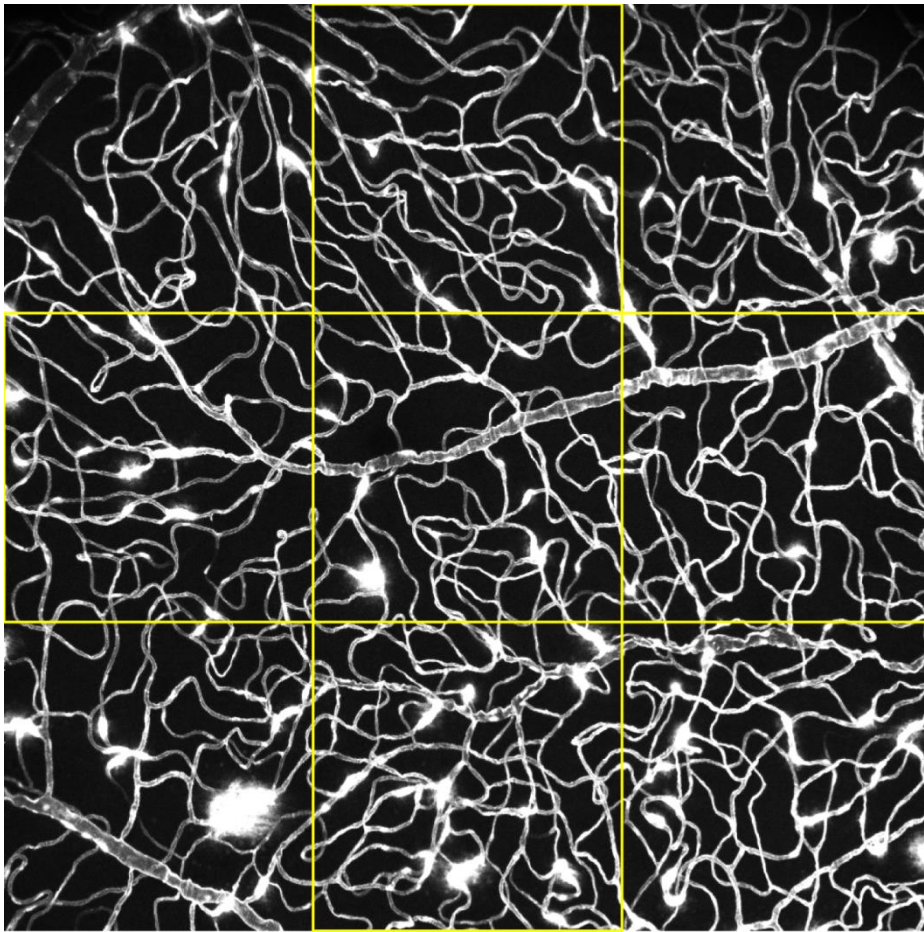

**Supplementary Figure 1.** Quantification method for capillary density. A  $3 \times 3$  grid is laid out on a  $1.24 \times 1.24$  mm field. Each capillary intersected by a yellow line was manually counted. The total number of intersected vessels were recorded as the relative vessel density of this study location.
