# Supplementary material for: Associations Between Capillary Diameter, Capillary Density, and Microaneurysms in Diabetic Retinopathy: A High-Resolution Confocal Microscopy Study
Source: PubMed Central journal article supplement — Transl Vis Sci Technol. 2021 Feb 9;10(2):6. doi: 10.1167/tvst.10.2.6 (PMC7873504; doi:10.1167/tvst.10.2.6), 2021-02-09
Supplement: tvst-10-2-6_s002.pdf [file tvst-10-2-6_s002.pdf]

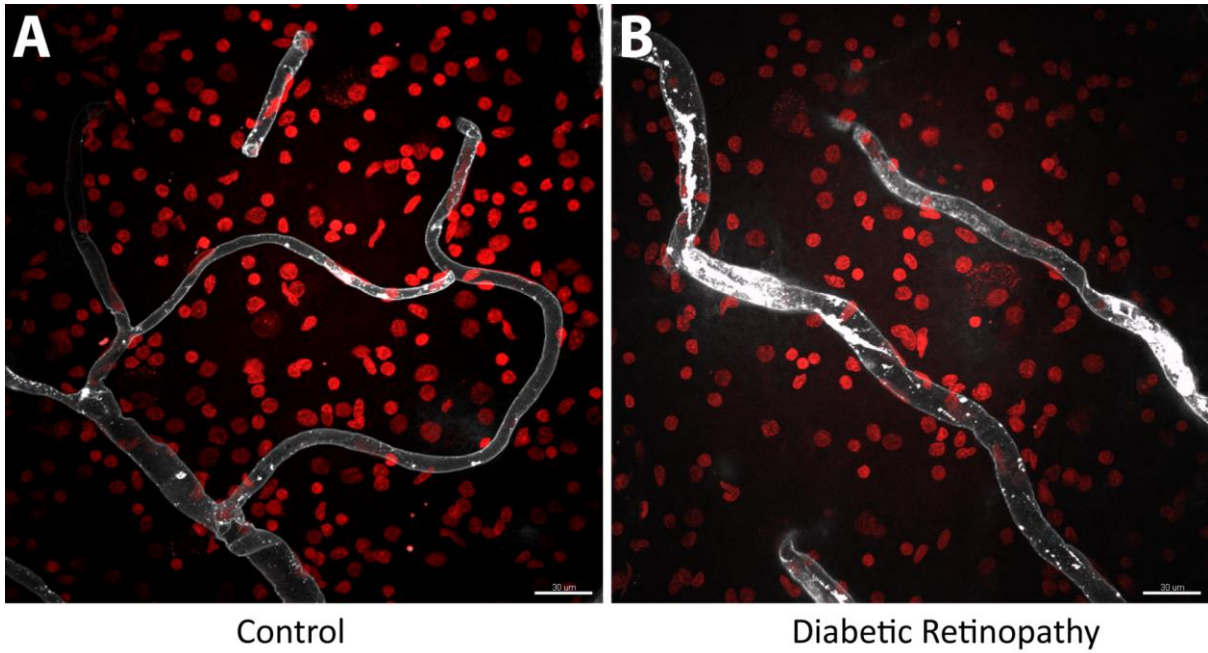

**Supplementary Figure 2.** Capillary diameter increases in diabetic retinopathy (DR). 40x magnification view of capillaries in *Control* (A) vs *DR* (B) in a region without microaneurysms. Capillaries in diabetic retina is visibly larger in diameter. The figures illustrate capillaries of the same plexus and same retina eccentricity in both groups using the same magnification.
